# Supplementary material for: Assessing caregivers’ perceptions of treatment-seeking for suspected severe malaria in the Democratic Republic of the Congo
Source: PubMed Central journal article supplement (PMC10571465; doi:10.1186/s12936-023-04737-6), 2023-10-13

## Additional file S1 to S2

### Sampling flow-charts

\*Same Health Zones (where the CARAMAL project was implemented in DRC).

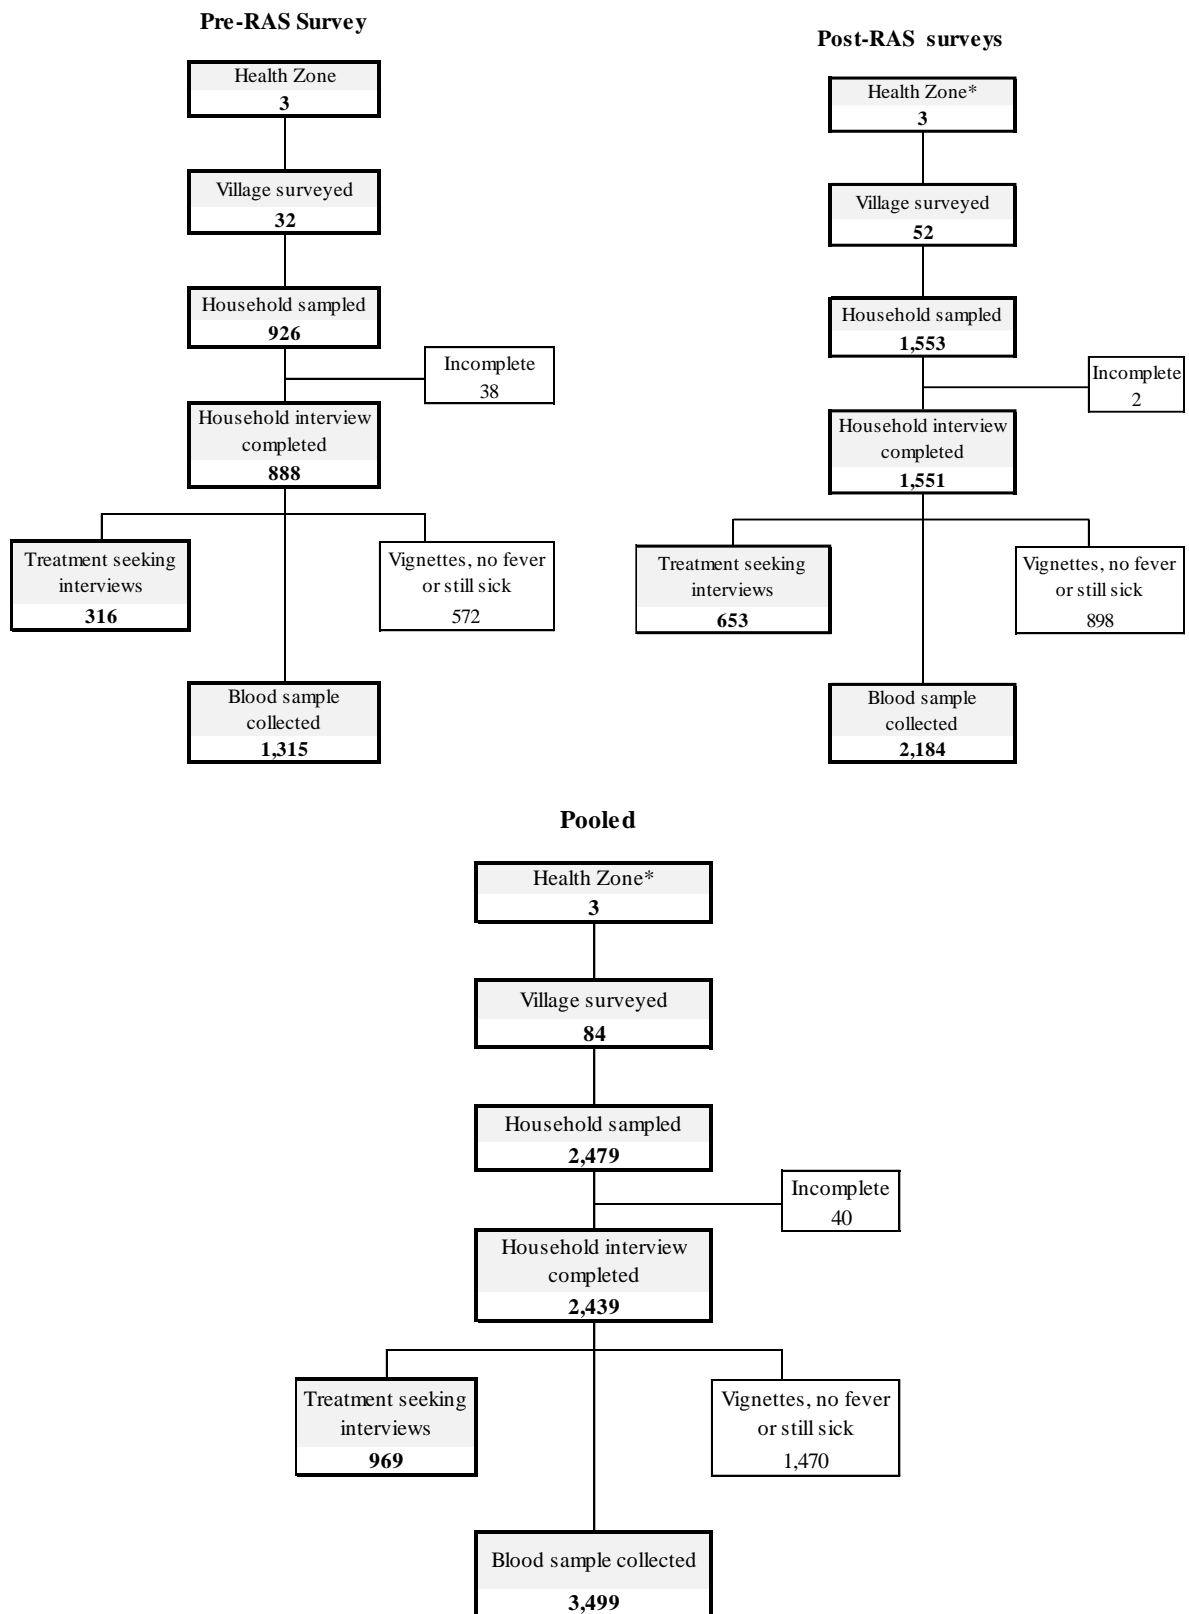

Figure S2: **Main sources of outside treatment visited by caregivers in baseline and midline surveys.** Baseline (N = 97). Midline (N = 91). CHW = Community Health Worker. PHC = Primary health care facilities. RHF = Referral Health facilities.

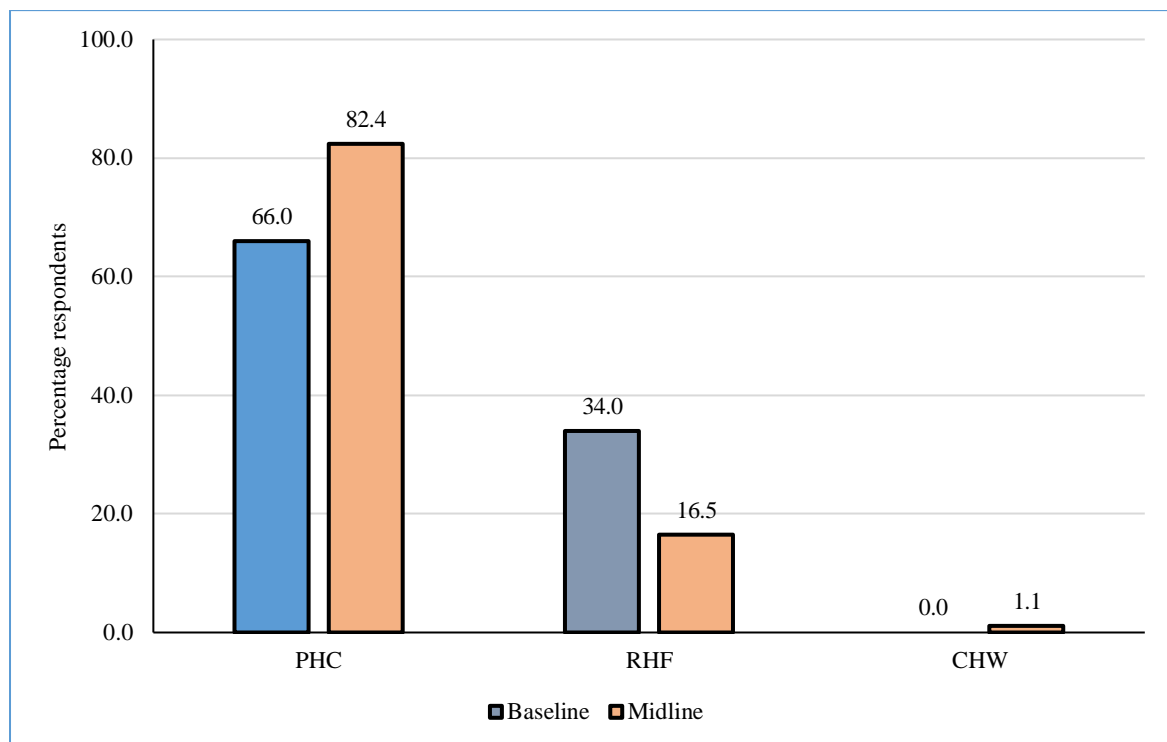

Supplement: 12936_2023_4737_MOESM1_ESM.pdf [file 12936_2023_4737_MOESM1_ESM.pdf]
