# Supplementary material for: Assessing caregivers’ perceptions of treatment-seeking for suspected severe malaria in the Democratic Republic of the Congo
Source: PubMed Central journal article supplement (PMC10571465; doi:10.1186/s12936-023-04737-6), 2023-10-13
Supplement: 12936_2023_4737_MOESM2_ESM.pdf [file 12936_2023_4737_MOESM2_ESM.pdf]

## Additional file

Table S1: Formula used to compute the weights

Weights are related to the probability of a village or a household being selected and were therefore used in the analysis.

|                                                                                                                                              |
|----------------------------------------------------------------------------------------------------------------------------------------------|
| $pweight_{overall} = \frac{1}{\text{probability of village being selected}} \times \frac{1}{\text{probability of household being selected}}$ |
| Whereas:                                                                                                                                     |
| $1/\text{probability of village being selected} = \frac{\text{Total } N \text{ villages in stratum}}{N \text{ villages selected}}$           |
| $1/\text{probability of household being selected} = \frac{\text{Total } N \text{ households in village}}{N \text{ households interviewed}}$  |
